# Supplementary material for: Proteomics reveals synergy between biomass degrading enzymes and inorganic Fenton chemistry in leaf-cutting ant colonies
Source: eLife. 2021 Jan 12;10:e61816. doi: 10.7554/eLife.61816 (PMC7877906; doi:10.7554/eLife.61816)
Supplement: Figure 3—source data 1. [file elife-61816-fig3-data1.xlsx]

## Sheet: Sheet1
	Source data for Figure 3
	Sequence ID	Amino acid sequence
	>FDP-9	MPKTSFDQDAALKEWKTARTGPLTRPFQMDHLTFVRLSKDAPPFSKEGFQDPSPFEGSAHIEFSFHMIGDLGKSSADTHSALQVDVVNLHPISRGSVTIHNSNPFHYPFIDIGLLAENIDVSILREGVRSIRRLLGGSAFEGSVFGSVIPPAHVTSDGDLEDLLRNTGTTFSHAVGSASMSPKDAEWGVVDPDFRVKGASGLRVVDASVIPFLPSAHTQVPVYGFAEWASIIIAGDYS
	>FDP-86	MTCLTSSAITRAHHPSKIQIMRVPRNLKSCINIQTLRDVGQLPVSFSMPSAIKLSLIAFTFYSIRSAFGALLVQSADDLPPGIDYDFIVAGGGTAGGVVASRLAENPEWNILVIEAGPSNRDIFASSVPGLLGQLQNTLVDWNYTTTPSPNGLPVHYSRARILGGCSSHNGMVFTRGSRDDWDRWAKIVEDDGLKWDNIMPYMLKAEKLVRDSENQTEQGHIDPSLHGVDGKLFLSPGFSDHPINDMFLQATEEIPTEFPFLLDMNNGRPIGISWNLLSIDSHAERSSSATAYVETSKDNLHVLFNTYVTRVLPVGNDKDFRGVEFAAGRQSTRKKLVARKEVILAGGVIGSPQALLNSGIGNRTELEAVGIKTLVDNPSVGRNFSDQVFGLGLFETTL…
	>FDP-178	MLGGCSSHNSMAYMRGSRDDWDKWAEIVEDDALKWDNMMPFIFKVERLIQNGTEQGHIDPSLYGHDGKIFMTSEWIDHPLNDMYLEVTKELPVEYPFLRDMNDGKPIGISWNLFTIDDHKERSSSATAYVETSSDNLHVLLNTYVTRVLPVENRTDFRGVEFAADAQSPREILFASKEVIIAGGVISSPQILLNSGIGNRSELETLGIEALVDNPSVGKNFTDQVYNLGIFNTTLPNTDFDLGAALAEWNATRTGRLMIPGPLLNQIIWMRLPDNSSIFGSDGFTDPSPGPNSPHVEVYTSRISSDLPSPFGEVAVPDLDGAVTLQVSVVNLHPASRGSISLESSDPFANPIIDLNLVSEPVDVAILREAHRNLRQLFMAQAFNGSVSGSLYPASNVTT…
	>FDP-191	PFKLKPGSVKRTDVNYIKRGYTSSQKYENMLPFTSLVSLALVTLVRGTLYNRFEDVPSHSPFDFVIIGGGTAGNALANRLTENPLFNVLVLEAGPSNEGVLDSIIPFFADKVVPFTPWDWNYTTIPMKELNNRSIVYPRGHILGGSSSVNYMAYNRGSSEDWDRYASISGDQGWSWDAVQQYFRKNENWTQPADNHDTIGQFDPNIHSTTGINGVSLPGFPQVPDSRVIQTTQSLPDEFPFNLDMNSGFHLGIGWSQSTISGGKRSSSATSYLGPQFISRKNLNVLVNARVTRVLKTGTSQDGKPQILGVEFVDAGNTDKNYTVQAQKELILSAGSVNTPQLLQLSGIGDRHLLSSLKIPTLVDNPSVGRNLSDHPLVLNMWFANVNASDTFQAAERDP…
	>FDP-23	MVYTRCSKNEYDAFANVAGDEHWGWDNILPYAYKNERHVPPNDGHNETGQYIPELHGFDGPLMTSLPGFSTDIDERVLAVTRENPEFPYNPDYNSGDPLGISWMHSTVGGPLRSSSATAYLMPAVQSRSNIDLLYNAQVTRLIQSGRAGSVPIFRGVEFARSSRSKRYTVTAIKEVVLSAGAIGTPQILLLSGIGPKDELSQLGINTIIDSPQVGKNLVDHPILPIQWTANSNNTFDPILRGGVALEDALNEYYTTGKGRLAANGVSNHMAFFRLPEDSPLLAPGDPSVGGTAPHFELAIANGFFSTSQPTPATGSYFSIINVVVSPTSRGTLTLASKDPFAHPIIDPKLLDSEFDRQAMLYSLRSAQRFAASQSFSDYITGNVTSLVTDEEVFAYMAQ…
	>TRAVE_73596	MKFKSLLLSLLPLVGSVYSQVAAPYVDSGNGFVFDGVTDPVHSVTYGIVLPQASTSTEFIGEFVAPNEAQWIGLALGGAMIGNLLLVAWPDGNKIVSSPRYATGYTLPAAYAGPTITQLPSSSVNSTHWKFVFRCQNCTAWNGGSIDPSGTGVFAWAFSNVAVDDPSDPNSSFAEHTDFGFFGINFPDAQSSNYQNYLAGNAGTPPPTSVPSGPSSTTTTTGPTATATPFDYIVVGAGPGGLVTADRLSEAGKKVLLLERGGPSTAETGGTYDATWAKSANLTKFDVPGLFETLFTDTNPFWWCKDTNFFAGCLLGGGTSVNGALYWYPNSRDFSTASGWPSSWGNHQPFTDKLKQRLPSTDHPSADGQRYLEQSATVVQQLLSGQGYSQITINDNPDS…
	>TRAVE_43286	MASPSLHEEEFDIILAGGGTAAGVIAGRLSSACPSLRILMLETGPHTQEDLAHVQPARFLSHLRPDTITAKHVVARPSEHLDGRSLIVQCGQCVGGGSSVNFTMYTRAPASDFDDWANVYNNPGWAFKDVLPLIKKIERYQNSPGVEHHTHGYDGPLKVSYGGYRNAVGEDYLATVAQYDTGRPIVNDINTMVEDVNRFERYPKWIDEQTGRRSDVPHHYVYNNASYGSNLQLRAACTVKRVIMENGRAVGVEYMHNPRINADADNVLHIAKAKRMVIVSAGTFGSPGILERSGIGAPGILKQNGVEPIVDLPGVGENYNDHPLLFLPFYAAEGTVTLDGIIRNDKEEIEKWSTQWVSEGKGLMATNGIDAGCKYRPTPAELEDIGPTFKERWESFYAN…
	>TRAVE_176148	MLSRPLLPLGLLCLLGQSSASLLTDHTLVAHKAYDFIVVGGGTAGSVLANRLTEHAGVKVLLIEAGVNNAAGPNVDEIQIPYFVSQIDATFDWNYTTVAQGALQNRTIPYPRGHVLGGSTSTNFMFYTRGSSDEFNKLARVSGDDGWSWKQILPYILKTETLTPPADGHNTVGQVDARIHGKSGPVLTSLPGNASVLDSRVIQTTSQLSEFPFNLDMNSGNPLGVGWLQSTIGHGVRSSAATAFLTEETLKRSNLDVLIGTRVTRLIQSKSSSATPTFLGVELAQTATGPRVQLTAAKEVILSAGSIGTPQILMLSGIGDKAELSAHKLATVVELPDVGKNMQDHPWVPLQWQVNSNDTLDTINRDPTLMNQLLALYDSKKQGPVANNPGGNQIGWFRL…
	>TRAVE_174721	MSTSSSDPFFNFTKSSFRSAAAQKASATSLPPLPGPDKKVPGMDIKYDVVIVGSGPIGCTYARELVEAGYKVAMFDIGEIDSGLKIGAHKKNTVEYQKNIDKFVNVIQGQLMSVSVPVNTLVIDTLSPTSWQASSFFVRNGSNPEQDPLRNLSGQAVTRVVGGMSTHWTCATPRFDREQRPLLVKDDTDADDAEWDRLYTKAESYFKTGTDQFKESIRHNLVLNKLAEEYKGQRDFQQIPLAATRRSPTFVEWSSANTVFDLQNRPNTDAPNERFNLFPAVACERVVRNTSNSEIESLHIHDLISGDRFEIKADVFVLTAGAVHNAQLLVNSGFGQLGRPDPANPPRLLPSLGSYITEQSLVFCQTVMSTELIDSVKSDMIIRGNPGDPGYSVTYTPGA…
	>PHACH_11098	MLGRSLLALLPFVGLAFSQSASQFTDPTTGFQFTGITDPVHDVTYGFVFPPLATSGAQSTEFIGEVVAPIASKWIGIALGGAMNNDLLLVAWANGNQIVSSTRWATGYVQPTAYTGTATLTTLPETTINSTHWKWVFRCQGCTEWNNGGGIDVTSQGVLAWAFSNVAVDDPSDPQSTFSEHTDFGFFGIDYSTAHSANYQNYLNGDSGNPTTTSTKPTSTSSSVTTGPTVSATPYDYIIVGAGPGGIIAADRLSEAGKKVLLLERGGPSTKQTGGTYVAPWATSSGLTKFDIPGLFESLFTDSNPFWWCKDITVFAGCLVGGGTSVNGALYWYPNDGDFSSSVGWPSSWTNHAPYTSKLSSRLPSTDHPSTDGQRYLEQSFNVVSQLLKGQGYNQATIN…
	>PHACH_137275	MFLDTTPFRADEPYDVFIAGSGPIGATFAKLCVDANLRVCMVEIGAADSFTSKPMKGDPNAPRSVQFGPGQVPIPGYHKKNEIEYQKDIDRFVNVIKGALSTCSIPTSNNHIATLDPSVVSNSLDKPFISLGKNPAQNPFVNLGAEAVTRGVGGMSTHWTCATPEFFAPADFNAPHRERPKLSTDAAEDARIWKDLYAQAKEIIGTSTTEFDHSIRHNLVLRKYNDIFQKENVIREFSPLPLACHRLTDPDYVEWHATDRILEELFTDPVKRGRFTLLTNHRCTKLVFKHYRPGEENEVDYALVEDLLPHMQNPGNPASVKKIYARSYVVACGAVATAQVLANSHIPPDDVVIPFPGGEKGSGGGERDATIPTPLMPMLGKYITEQPMTFCQVVLDSSL…
	>PHACH_126879	MGHPEEVDVIVCGGGPAGCVVAGRLAYADPTLKVMLIEGTSGHCGANNRDDPWVYRPGIYVRNMQRNGINDKATFYTDTMASSYLRGRRSIVPCANILGGGSSINFQMYTRASASDWDDFKTEGWTCKDLLPLMKRLENYQKPCNNDTHGYDGPIAISNGGQIMPVAQDFLRAAHAIAMLTPCTDDIQDLTTAHGAEIWAKYINPHTGRRSDAATAYVHSVMDVQDNLFLRCNARVSRVLFDDNNKAVGVAYVPSRNRTHGGKLHETIVKARKMVVLSSGTLGTPQILERSGVGNGELLRQLGIKIVSDLPGVGEQYQDHYTTLSIYRVSNESITTDDFLRGVKDVQRELFTEWEVSPEKARLSSNAIDAGFKIRPTEEELKEMGPEFNELWNRYFKDK…
	>PHACH_131961	MPFVATEDLADVQPDYIVVGGGTAGLTLAARLTEDPAITVLVVEAGVHHGPTPEIDVPGYMGRTMTNPKFDWTFFSVPQKRANDRVVLQPRGKGLGGSSLINYLGIFRPSKIELDAIEELGNPGWNWDSLLHYMKKARNAAECLQPPDVSRTNALKYAMKPDLEYHGPIKNSFGPVLGEMHMKLFDSAQALGIPRNPETGNGRNDGCMTSLLSVDATTAKRSYAASAYLEPNLDRSNLLVLTEAYVTKVLLEENGDLRRAVGIEYLKGGIQLRIDNVKRDVIVAAGTLQTPQILELSGIGNPTILSQFGIETIIDLPGVGENLQDHVGVTTIVEVNTRDETTDVLADPLMLVLVRALASEYCNIQSAQDGHSWKDQAHAQNTEVLANTLPSLKSGLEKQ…
	>PHACH_135972	MALALRPVFASLITLLTATLANAALYTDASQLPDNTYDFVVVGAGTAGNVMAARLSENPKFKVLVIEAGISNEGVRNVEVPFLATQNIPATPVTWNYTTVPQAGLDNRTVAYPRGRVLGGSSSINFLAYTRGSDAEFDRWANLTGDEGWSWANLLPYYLKNARLVPPADHHNTSGEVIPADHGYGPLEMSLPGFPTTADQKVVATTQVNGSLFPYNIDLNSGNSVGIGLIQSTIGHGERSSSATAYLEPALNRPNLHLLIENTVTRLVSTKGSNGVPTFTGVEFAASASAPRHTVTVKKEIILSAGSIGTPQILLLSGVGNKTDLASIGIPSVVDLPDVGQNLKDHPILSNYWQVTMNDTFDDVYRDTSVFNAKLAQWQSSRTGLFADSPTNALGFLRI…
	>RHOPL_128830	MDAPTVFLVFILAVFTLRAQTCKPLPNPPSESDIESFLRVDYDYVIIGGGTAGLALAARLSEDPEVHVAVLEAGYFHLGDPIVDVPEYVDEAAGNSSYDWGFSTTPQAYAGGRNLSLPRGKMLGGSSGINGMAWNRASRAEYDAWRTFAPENDWTWDGLLPFFKKSENLSLSPSDPYPGITPMEKAQAVKILPKVDGFSGPIVASYNSHYFEDAPLLVETLNAIGIPTNPDSQSGNSTGIFNTLASLDRRTGTRSYAAMGYYCDQPVRANLHILVDAQVTKIHFVEGEELVIATAVQFAVGPTSYVVNASREVILSAGTIQTPQILELSDILRNNATFAAEQKELYFANRTGLLAATDNTVTLIPLQSVVDDEEFASLLALFDHEAQKPGLSQLQKLQY…
	>RHOPL_108489	MRAVSLFLAAVPLASVAGYSTGRHPDAYHDFHERELLRRNIVYDGSIASSYDYVIVGGGTAGLVLASRLSENSNTSVLVLEAGDTGEAVQDKIDIPSYTYYNSLVGSSYDWAYETVAQPDADNRQISWPRGKVLGGSSAINGMYLVRPSELEINAWASLVPNGSIWNWDNMYAAMKKSETYTPPLSNVQDTAKIEYSNSSHGFSGPLHASYPGYMMPQVGDWTPSLNNIDIMTSPNPDGGDGWGAFVATSAINPANWTRSYSRSAYIDPLPPRANLAILPNATVTRIVFANATGGLTATGVQYASQKGATESTVSVNKEVILAAGAIGSPQILMVSGVGPQDVLEAAGVAVQVALPGVGQHLQDHLYAEVTWKTNEQTAGSMFYGNYSNLNDVPTTSTP…
	>RHOPL_54008	AGTAGLVIANRLSEIPSNSVLVIEAGISNLADPSDEVPFLDSTLSPDTILTWNYTTTPQSGLNDRTLPYPRGRVLGGSSTINFQIWTRGSVDDYNRYANVTGDPGWSWNEILPYMKKARTPVFSSYGTLKIQFQSESLVPPSDHHNTTGQVDPLVHGTSGPVQISLAGYSTGIDQRVIETSHELQHEFPYNIDYNAGYPLGLGWSVGAVSTSGRRSSSATAYLDPILSRSNLDVLIQTQVTKLVSQNSTGGSLSFRTVEMAQSSTSERYTVSATKEVILSAGTIGTAQILQLSGIGDPALLESVGVTPLVNSPNVGQHLTDHPLLSNQWLVNTSFTLDNVARNATLADELLQEWNTTGTGVFVDDGTNQIAWTRLANETEVFKNVTDPSAGPASPHIEL…
	>PHLBR_123747	MVFYSVHDHGDMETDVFIAGSGPIGAVYAKKCVDAGLRVIMVEVGAARHSPFTSDSMTSKPVVPHDASHLRSVEFRPGHVLIPGYHKKNQIEYQKDIDRFGALSTVSIPTSNVNIPTVDPDSFQATLVSFSTPFLFMGRNPAQNPFENLGAEAVTRGVGGMTTHWTCATPRLNPHIERPVLDKDPATNEKIWDDLYTEAEEIIGTSRTQFNKSIRQTLVLEALGETPNRAFVPLPLACHRLDDPGYVEWHATDRILEELFTDLEKSKRFTLMTNHICTKVSMVPRLKGPGGEQDQYEAYVIACGAVGTAQVLANSQRPEPLLDGENEDDKTIIETPLTPNLGSYITEQPMTFCQVVLNADIIAKVDTEPHRPDWWVQGVEDHIRQYPQDPIHIPFRDPE…
	>PHLBR_160653	MLRRSLLTLLPFIGTALSQSASTFVDPVNGYQFTGLTDPVHDVTYGFTFPPLPTSGSDSTEFIGEIVAPIDSQWIGLALGGDMIQDLLLVAWPNDGDIVFSTRWATDYIQPVAYTGDATVTTISSSINSTYWRWVFRCEGCTSWTGGGIDVDSEGVLAWAFSNIAVDDPSDPESTFQEHTDFGFFGIDYSTAHVSSSTYSGYLNGQGGSSSPPTTSSAPPSQTSSAPPGPTTPAVAYDYVVVGGGPGGIIAADRLSEAGKKVLLLERGGPSTAETGGNYVAPWASAAGSNLTKFDIPGLFESMFTDPDDWWWCKDVTVFAGCLLGGGTSINGALYWYPNSNDFSTGVGWPSSWTNAEPYTNQLIARLPSTDAPSVDGKRYLEESATLVGQFLSSQGYSQ…
	>PHLBR_157963	MSAPPLIESEYDLIIAGGGTAGCIVAGRLAAAAPQLKILILEIGPGTKDDPAHVQLGRFTSHYVPTAKTIRFHFSQPSEALAGRSVPVMAGSCLGGGSSVNFGMYTRGSASDYDTWEQTHANPGWGFKDLLPLFKKTETYQVKPDMPTHGYSGPLKVSYGSLCTDIGKEFLSAIGQTDPNRSGDSSRDATDFHEVNVYNQWAKWSDEKTGRRSDVPHHYIYNQEANTNLHVVTGVNVLRVVLEDNRAVGVEYQWNSTVLSDVDCEVHTVRARKMVVISSGAFGTPAILERSGIGGKAVLEKLNIPIKVDLEGVGIDYQDHNIMFIPYYARSDTKTLDALFRSEPDAVTEAEEEWLKSGQGLLATNGVDGGGRLRPSEQELEEWGPEFKQRWATEFAPYL…
