# Supplementary material for: Proteomics reveals synergy between biomass degrading enzymes and inorganic Fenton chemistry in leaf-cutting ant colonies
Source: eLife. 2021 Jan 12;10:e61816. doi: 10.7554/eLife.61816 (PMC7877906; doi:10.7554/eLife.61816)
Supplement: Figure 4—source data 1. [file elife-61816-fig4-data1.xlsx]

## Sheet: Fenton assay
	Data for figure 4A				Data for figure 4B				Data for figure 4C
	Colony	Treatment	Nanomoles H2O2 per microliter fecal fluid		Colony	Treatment	Change in absorbance at 532 nm		Colony	Treatment	Micromolar Fe2+ increase per minute
	Ae150	Control	0.888434		Ae150	No additive	0.366		Ae150	Control	0.170713
	Ae150	Glucose	0.735041		Ae150	Phenanthroline	0.067		Ae150	Glucose	0.24827
	Ae150	Methanol	0.617164		Ae150	Solvent	0.309		Ae160	Control	0.192613
	Ae150	Glyoxal	1.65801		Ae160	No additive	0.594		Ae160	Glucose	0.255043
	Ae150	Veratryl alcohol	9.1295		Ae160	Phenanthroline	0.087		Ae263	Control	0.081287
	Ae150	Catalase	0.123206		Ae160	Solvent	0.48		Ae263	Glucose	0.160891
	Ae150	Veratryl alcohol + catalase	0.181915		Ae263	No additive	0.37		Ae356	Control	0.094153
	Ae160	Control	1.10111		Ae263	Phenanthroline	-0.018		Ae356	Glucose	0.140603
	Ae160	Glucose	0.982917		Ae263	Solvent	0.365		Ae480	Control	0.104459
	Ae160	Methanol	0.817616		Ae356	No additive	0.326		Ae480	Glucose	0.180685
	Ae160	Glyoxal	2.24102		Ae356	Phenanthroline	0.189		Ae490	Control	0.080953
	Ae160	Veratryl alcohol	9.042		Ae356	Solvent	0.345		Ae490	Glucose	0.137483
	Ae160	Catalase	0.0997294		Ae480	No additive	0.341
	Ae160	Veratryl alcohol + catalase	0.0645223		Ae480	Phenanthroline	0.02
	Ae263	Control	0.259742		Ae480	Solvent	0.319
	Ae263	Glucose	0.259742		Ae490	No additive	0.374
	Ae263	Methanol	0.203258		Ae490	Phenanthroline	0.036
	Ae263	Glyoxal	1.15355		Ae490	Solvent	0.36
	Ae263	Veratryl alcohol	3.15401
	Ae263	Catalase	0
	Ae263	Veratryl alcohol + catalase	0
	Ae356	Control	0.531007
	Ae356	Glucose	0.474474
	Ae356	Methanol	0.508393
	Ae356	Glyoxal	1.94767
	Ae356	Veratryl alcohol	2.35685
	Ae356	Catalase	0.0225776
	Ae356	Veratryl alcohol + catalase	0.0225776
	Ae480	Control	0.273779
	Ae480	Glucose	0.273779
	Ae480	Methanol	0.262364
	Ae480	Glyoxal	1.36115
	Ae480	Veratryl alcohol	3.43744
	Ae480	Catalase	0.0228007
	Ae480	Veratryl alcohol + catalase	0.0228007
	Ae490	Control	0.182478
	Ae490	Glucose	0.171068
	Ae490	Methanol	0.159659
	Ae490	Glyoxal	0.593659
	Ae490	Veratryl alcohol	4.36697
	Ae490	Catalase	0
	Ae490	Veratryl alcohol + catalase	-0.0227981
